# Supplementary material for: Comparative proteomic study of dog and human saliva
Source: PubMed Central journal article supplement (PMC6279226; doi:10.1371/journal.pone.0208317), 2018-12-04
Supplement: pone.0208317.s002.pdf [file pone.0208317.s002.pdf]

**Supplementary data 2 : Proteins found only in dogs**

| <b>Protein name</b>                                                                                     | <b>Accession number</b> | <b>ID Score</b> | <b>Peptide</b>      | <b>DOG</b> | <b>HUMAN</b> |
|---------------------------------------------------------------------------------------------------------|-------------------------|-----------------|---------------------|------------|--------------|
| hCG2036717 [Homo sapiens]                                                                               | gi 119571781            | 15.28           | KDNKHLLM            | 3.55149    | 0            |
| protein FAM110A [Homo sapiens]                                                                          | gi 46391104             | 11.34           | GPADGGARKPSAVER     | 3.615547   | 0            |
| unnamed protein product [Homo sapiens]                                                                  | gi 32458                | 11.2            | YDGLVGMFDPQR        | 3.743165   | 0            |
| armadillo repeat-containing protein 2 isoform X2 [Homo sapiens]                                         | gi 578812995            | 4.3699999       | IILALK              | 3.775933   | 0            |
| DNA damage-induced apoptosis suppressor protein [Homo sapiens]                                          | gi 194239694            | 11.35           | IILVSK              | 3.916139   | 0            |
| coronin 6, isoform CRA_d [Homo sapiens]                                                                 | gi 119571592            | 1.48            | GGAHK               | 4.111305   | 0            |
| alternative protein ZNF644 [Homo sapiens]                                                               | gi 440576095            | 12.25           | KSLMPR              | 4.173955   | 0            |
| collagen alpha-1(I) chain-like [Canis lupus familiaris]                                                 | gi 545489812            | 8.96            | GAGGTAGQQR          | 4.479076   | 0            |
| histone H2A type 2-A [Homo sapiens]                                                                     | gi 106775678            | 14.9            | VTIAQGGVLPNIQAVLLPK | 4.701959   | 0            |
| calcineurin-binding protein cabin-1 isoform X11 [Homo sapiens]                                          | gi 578837053            | 10.56           | VSSMLQRTPDQGKK      | 4.702742   | 0            |
| hCG2007771 [Homo sapiens]                                                                               | gi 119630298            | 16.77           | LGIGGIGRRLWR        | 4.79344    | 0            |
| E3 ubiquitin-protein ligase XIAP isoform X1 [Homo sapiens]                                              | gi 578838669            | 12.7            | MTFNSFEGSK          | 5.164847   | 0            |
| PHD finger protein 3 isoform X1 [Homo sapiens]                                                          | gi 578812606            | 24.07           | QNMTTDAPKKIVAANK    | 5.181479   | 0            |
| bioorientation of chromosomes in cell division protein 1-like 1 isoform X2 [Homo sapiens]               | gi 578808374            | 4.0599999       | KREVSPPGARTR        | 5.204606   | 0            |
| intracellular hyaluronan-binding protein 4 isoform X1 [Homo sapiens]                                    | gi 530390749            | 3.6700001       | AVVIHK              | 5.226727   | 0            |
| tRNA methyltransferase 10 homolog B isoform X8 [Homo sapiens]                                           | gi 578816380            | 19.43           | HWEKIVAANK          | 5.271495   | 0            |
| protein-methionine sulfoxide oxidase MICAL3 isoform X15 [Homo sapiens]                                  | gi 578836826            | 18.43           | AQIIQR              | 5.338539   | 0            |
| unnamed protein product, partial [Homo sapiens]                                                         | gi 40042734             | 8.6499996       | GPAGXGK             | 5.424545   | 0            |
| unnamed protein product, partial [Homo sapiens]                                                         | gi 218347496            | 4.9699998       | TCGPRSMMAAR         | 5.492964   | 0            |
| nibrin isoform X2 [Homo sapiens]                                                                        | gi 530389034            | 12.12           | KLSSAVVFGGGEAR      | 5.51483    | 0            |
| suppressin [Homo sapiens]                                                                               | gi 3293442              | 7.5100002       | IHADAKR             | 5.585447   | 0            |
| hCG2007967, partial [Homo sapiens]                                                                      | gi 119593232            | 25.8099999      | MRSQNAALSGSGPR      | 5.587793   | 0            |
| dedicator of cytokinesis protein 10 isoform X10 [Homo sapiens]                                          | gi 578804561            | 5.8099999       | ANHSVAR             | 5.58928    | 0            |
| Ig H-chain, partial [Homo sapiens]                                                                      | gi 185315               | 17.42           | GITGTT              | 5.635132   | 0            |
| truncated ganglioside differentiation associated protein 1 [Homo sapiens]                               | gi 320461577            | 9.7799997       | QGRRGG              | 5.849613   | 0            |
| zinc finger protein 14 homolog isoform X1 [Homo sapiens]                                                | gi 530416944            | 25              | EPGMVVR             | 5.894667   | 0            |
| A Chain A, Dbl And Pleckstrin Homology Domains From Hsos1                                               | gi 6729800              | 12.6            | KXNEIQK             | 5.926031   | 0            |
| transcription elongation factor A protein-like 5 [Canis lupus familiaris]                               | gi 545558799            | 8.6199999       | KQKMGGFHWMPR        | 6.117252   | 0            |
| CCR4-NOT transcription complex subunit 3-like [Homo sapiens]                                            | gi 530436103            | 10.79           | APDARLALGSAR        | 6.231001   | 0            |
| gap junction delta-4 protein [Homo sapiens]                                                             | gi 145699105            | 7.4899998       | GSGSEEQPSAAPS       | 6.403089   | 0            |
| ubiquitously transcribed tetratricopeptide repeat protein Y-linked transcript variant 13 [Homo sapiens] | gi 148733150            | 13.5            | CYXNAAR             | 6.444706   | 0            |
| polymerase delta-interacting protein 2 isoform 1 [Homo sapiens]                                         | gi 7661672              | 7.0900002       | GRGVVGREPVLSK       | 6.749978   | 0            |

|                                                                                     |              |            |                     |          |   |
|-------------------------------------------------------------------------------------|--------------|------------|---------------------|----------|---|
| mitochondrial 10-formyltetrahydrofolate dehydrogenase precursor [Homo sapiens]      | gi 238814322 | 10.35      | EESFGPIMVISK        | 6.758795 | 0 |
| hypothetical protein FLJ37396, isoform CRA_a [Homo sapiens]                         | gi 119568743 | 16.620001  | NKNMKDDDL SMK       | 6.767944 | 0 |
| non-histone chromosomal protein HMG-17-like [Canis lupus familiaris]                | gi 545520510 | 12.92      | QIRHRK LK           | 6.783366 | 0 |
| PHD finger protein 10 isoform b [Homo sapiens]                                      | gi 194328736 | 13.98      | RDLSHK              | 6.918173 | 0 |
| unnamed protein product, partial [Homo sapiens]                                     | gi 40039260  | 14.42      | VVYGS R             | 6.95277  | 0 |
| cyclin-dependent kinase inhibitor 1 [Canis lupus familiaris]                        | gi 545518904 | 8.1700001  | GGRDDLGGGK          | 7.006785 | 0 |
| zinc finger protein 598 [Homo sapiens]                                              | gi 409264581 | 10.51      | CSTKMR              | 7.007197 | 0 |
| dexamethasone-induced Ras-related protein 1 isoform X1 [Canis lupus familiaris]     | gi 73956260  | 12.37      | EKASGGGQAK          | 7.030478 | 0 |
| AMP deaminase 2 isoform X2 [Homo sapiens]                                           | gi 578798942 | 3.98       | FIKRAMK             | 7.158061 | 0 |
| coagulation factor VIII isoform X1 [Canis lupus familiaris]                         | gi 545557151 | 18.129999  | EGSLAKER            | 7.370575 | 0 |
| zinc finger protein 568 isoform 2 [Homo sapiens]                                    | gi 325651956 | 6.7600002  | ASLSIHK             | 7.419601 | 0 |
| myotubularin-related protein 10 isoform X3 [Canis lupus familiaris]                 | gi 545493194 | 14.04      | SISGTPLSKFLSGAK     | 7.520732 | 0 |
| sorting nexin-25 isoform X4 [Homo sapiens]                                          | gi 578809437 | 18.02      | RVVISHNMDK          | 7.611645 | 0 |
| zinc finger protein 836 [Homo sapiens]                                              | gi 156627573 | 13.16      | MHTGDKPYK           | 7.766491 | 0 |
| protein PRRC2B [Canis lupus familiaris]                                             | gi 345805923 | 12.61      | KELAKRSFSSQRPLADR   | 7.777759 | 0 |
| 39S ribosomal protein L11, mitochondrial isoform X1 [Homo sapiens]                  | gi 578821681 | 5.3200002  | AGLAMPGPPLGPVLGQR   | 7.77847  | 0 |
| HLA class I histocompatibility antigen, alpha chain F isoform X4 [Homo sapiens]     | gi 578842317 | 3.8599999  | TLAMSGK             | 7.859496 | 0 |
| AF119917_31 PRO2249 [Homo sapiens]                                                  | gi 7770175   | 11.59      | MDLPTCGAR           | 7.994611 | 0 |
| coiled-coil domain-containing protein 136 isoform X13 [Homo sapiens]                | gi 578814522 | 13.98      | GGSVGSLSVNK         | 8.085492 | 0 |
| notch related protein, partial [Homo sapiens]                                       | gi 1749368   | 4.79       | GDSPGPR             | 8.093087 | 0 |
| RNA-binding motif protein, X chromosome isoform 1 [Homo sapiens]                    | gi 56699409  | 6.25       | SRGPPRGLR           | 8.13002  | 0 |
| unnamed protein product [Homo sapiens]                                              | gi 194389262 | 4.2399998  | GNNICEGGEEMDNK      | 8.16553  | 0 |
| hCG1654062 [Homo sapiens]                                                           | gi 119627151 | 19.02      | TEANGT              | 8.209194 | 0 |
| unnamed protein product [Homo sapiens]                                              | gi 194381768 | 12.38      | KEDGTPAATGGSQPPSMGR | 8.303342 | 0 |
| zinc finger protein 609 [Homo sapiens]                                              | gi 71725360  | 9.2700005  | MSLSSGASGGK         | 8.445717 | 0 |
| hCG1820498 [Homo sapiens]                                                           | gi 119577805 | 8.3299999  | TTWKIFLNSCLSKIK     | 8.581983 | 0 |
| bcl-2-like protein 10 isoform X1 [Homo sapiens]                                     | gi 530405270 | 15.11      | EQEGDVAR            | 8.605927 | 0 |
| unnamed protein product, partial [Homo sapiens]                                     | gi 40042882  | 7.9899998  | YDIFDPR             | 8.709718 | 0 |
| leiomodrin-2 [Canis lupus familiaris]                                               | gi 359321176 | 7.6599998  | KQPNNILKEIKNSLR     | 8.735965 | 0 |
| carcinoembryonic antigen-related cell adhesion molecule 18 precursor [Homo sapiens] | gi 508083061 | 15.26      | MDLSRPR             | 8.804919 | 0 |
| SH2B adapter protein 3 isoform X1 [Canis lupus familiaris]                          | gi 545543838 | 8.8999996  | AGLARK              | 8.842726 | 0 |
| iroquois-class homeodomain protein IRX-5 isoform X2 [Canis lupus familiaris]        | gi 545491132 | 14.69      | KGHP T LLE          | 8.861404 | 0 |
| mitogen-activated protein kinase kinase kinase 6 [Canis lupus familiaris]           | gi 545492222 | 20.8799999 | SRSPGSPR            | 9.084064 | 0 |
| cohesin subunit SA-3 isoform X1 [Canis lupus familiaris]                            | gi 545500886 | 12.11      | QASEGHPPVGRITGR     | 9.473022 | 0 |
| 60S ribosomal protein L13 isoform 2 [Homo sapiens]                                  | gi 341604768 | 20.120001  | TIGISVDPR           | 9.561173 | 0 |
| C2 domain-containing protein 3 [Canis lupus familiaris]                             | gi 545537153 | 11.82      | KGQGSAGVR           | 9.567533 | 0 |

|                                                                                                                                 |              |                       |          |   |
|---------------------------------------------------------------------------------------------------------------------------------|--------------|-----------------------|----------|---|
| SEC23-interacting protein isoform X2 [Canis lupus familiaris]                                                                   | gi 545548137 | 18.93 QKAVKLEQKK      | 9.604817 | 0 |
| F-box/LRR-repeat protein 19 isoform 1 [Homo sapiens]                                                                            | gi 157168349 | 14.79 ADNGEEGASLGSGWK | 9.837845 | 0 |
| baculoviral IAP repeat-containing protein 2 isoform 2 [Homo sapiens]                                                            | gi 390608639 | 8.5600004 NTSPMR      | 9.931263 | 0 |
| inositol 1,4,5-trisphosphate receptor type 3 isoform X3 [Homo sapiens]                                                          | gi 578811675 | 2.72 KGSGK            | 9.972209 | 0 |
| WAS/WASL-interacting protein family member 3-like [Homo sapiens]                                                                | gi 530380345 | 5 ASFGR               | 10.1116  | 0 |
| unnamed protein product, partial [Homo sapiens]                                                                                 | gi 40979160  | 14.45 HSRXWDFR        | 10.12257 | 0 |
| disintegrin and metalloproteinase domain-containing protein 8 [Canis lupus familiaris]                                          | gi 545548488 | 8.96 VSAAFPRP         | 10.33356 | 0 |
| ERI1 exoribonuclease 3 isoform X2 [Homo sapiens]                                                                                | gi 530363292 | 9.0900002 TLPTS       | 10.39998 | 0 |
| sirtuin (silent mating type information regulation 2 homolog) 3 ( <i>S. cerevisiae</i> ), isoform CRA_a, partial [Homo sapiens] | gi 119581643 | 7.8099999 EAGAGR      | 11.30224 | 0 |
| exonuclease 3'-5' domain-containing protein 1 isoform X5 [Canis lupus familiaris]                                               | gi 545549483 | 12.99 YLSFLEERQK      | 11.79414 | 0 |
| F-BAR and double SH3 domains protein 1 isoform X2 [Canis lupus familiaris]                                                      | gi 545490432 | 11 LAGPFLKK           | 12.34407 | 0 |
